# Supplementary material for: Evaluation of Prebiotics through an In Vitro Gastrointestinal Digestion and Fecal Fermentation Experiment: Further Idea on the Implementation of Machine Learning Technique
Source: MDPI journal article supplement (doi:10.3390/foods11162490), 2022-08-17
Supplement: s1 [file s1]

Supplementary Table S1. Best performed hyper-parameters of each machine learning model

| Algorithm                           | Feature           | Genus composition |            |           | Pathway profile |            |           |
|-------------------------------------|-------------------|-------------------|------------|-----------|-----------------|------------|-----------|
|                                     | Hyper-parameter   | Acetate           | Propionate | Butyrate  | Acetate         | Propionate | Butyrate  |
| Random forest (RF)                  | bootstrap         | False             | False      | False     | False           | False      | False     |
|                                     | max_depth         | 10                | 10         | 30        | 30              | 10         | 10        |
|                                     | max_features      | sqrt              | sqrt       | sqrt      | sqrt            | sqrt       | sqrt      |
|                                     | min_sample_leaf   | 2                 | 1          | 1         | 2               | 1          | 4         |
|                                     | min_samples_split | 2                 | 2          | 2         | 5               | 2          | 2         |
|                                     | n_estimators      | 100               | 50         | 50        | 50              | 10         | 10        |
| Extreme gradient boosting (XGBoost) | colsample_bytree  | 0.6               | 0.6        | 0.6       | 1               | 1          | 1         |
|                                     | gamma             | 100               | 0.01       | 100       | 1               | 0.01       | 0.01      |
|                                     | learning_rate     | 0.1               | 0.01       | 0.01      | 0.1             | 0.1        | 0.01      |
|                                     | max_depth         | 5                 | 50         | 5         | 5               | 10         | 5         |
|                                     | min_child_weight  | 10                | 2          | 10        | 10              | 5          | 1         |
|                                     | n_estimators      | 500               | 1000       | 1000      | 1000            | 500        | 1000      |
|                                     | reg_alpha         | 0.01              | 100        | 1         | 0.01            | 1          | 0.01      |
|                                     | reg_lambda        | 1                 | 0.01       | 1         | 1               | 1          | 1         |
|                                     | subsample         | 0.6               | 0.6        | 0.6       | 0.6             | 1          | 0.6       |
| Support vector machine (SVM)        | C                 | 10000000          | 100        | 1000      | 1000000         | 10000      | 1000      |
|                                     | gamma             | 0.001             | 100        | 100       | 1               | 100        | 1000      |
|                                     | kernel            | sigmoid           | rbf        | rbf       | rbf             | rbf        | rbf       |
| Lasso                               | alpha             | 0.01              | 0.01       | 0.01      | 0.001           | 0.001      | 0.001     |
| Ridge                               | alpha             | 0.001             | 0.01       | 0.01      | 0.00001         | 0.00001    | 0.00001   |
| Elastic net (ENet)                  | alpha             | 0.0001            | 0.0001     | 0.0001    | 0.000001        | 0.000001   | 0.000001  |
|                                     | l1_ratio          | 0.5               | 0.2        | 0.2       | 0.5             | 0.5        | 0.5       |
| k-nearest neighbor (KNN)            | algorithm         | auto              | auto       | auto      | ball_tree       | ball_tree  | ball_tree |
|                                     | leaf_size         | 1                 | 1          | 1         | 40              | 5          | 5         |
|                                     | metric            | minkowski         | minkowski  | minkowski | jaccard         | jaccard    | jaccard   |
|                                     | n_neighbors       | 5                 | 1          | 20        | 40              | 30         | 30        |
|                                     | p                 | 1                 | 1          | 1         | 1               | 1          | 1         |
|                                     | weights           | distance          | uniform    | distance  | uniform         | distance   | distance  |
